# Supplementary material
Source: PubMed Central journal article supplement (PMC6022372)

**Appendix**  
**Dietary Quality of Americans by Supplemental Nutrition Assistance Program Participation Status:**  
**A Systematic Review**  
**Andreyeva et al.**

**Appendix Figure 1.**

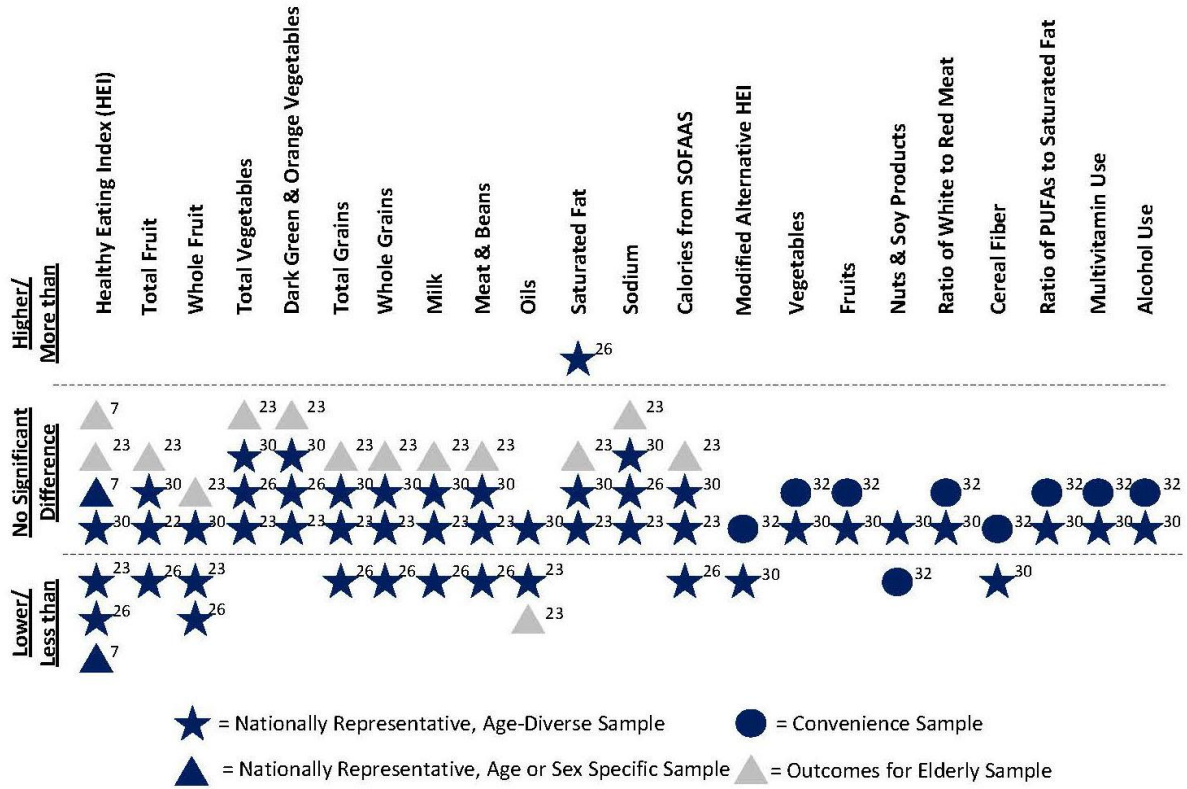

Supplement: NIHMS835181-supplement-Supplementary_Materials.pdf [file NIHMS835181-supplement-Supplementary_Materials.pdf]
